# Supplementary material
Source: Springer Nature journal article supplement (https://www.springermedizin.de/resource/supplementary/12889_2012_5515_MOESM1_ESM.pdf/9495538)
Supplement: MOESM1 [file 9495538]

Participants SHIP-0: N=4308

Participants that died between SHIP-0 and SHIP-1 or refused to participate in SHIP-1: N=1008

Participants SHIP-1: N=3300

Participants without complete data on blood pressure values and risk comorbidities: N=22

Participants with complete data on blood pressure values and risk comorbidities: N=3278

Participants not in need of treatment with respect to their blood pressure in SHIP-0: N=1517

Participants in need of treatment with respect to their blood pressure among SHIP-0 participants: N=1761

Participants in need of treatment with respect to their blood pressure without complete data to further chronic diseases: N=7

Participants in need of treatment with respect to their blood pressure with complete data to further chronic diseases: N=1754

Participants in need of treatment without complete data to all dependent variables of the logistic regression model: N=5

Participants in need of treatment with complete data to all dependent variables of the logistic regression model: N=1749
